# Supplementary material for: When cost-effective interventions are unaffordable: Integrating cost-effectiveness and budget impact in priority setting for global health programs
Source: PubMed Central journal article supplement (PMC5624570; doi:10.1371/journal.pmed.1002397), 2017-10-02
Supplement: pmed.1002397.s001.pdf [file pmed.1002397.s001.pdf]

## S1 Table: Articles with formal and informal BIA

A Bilinski, P Neumann, J Cohen, T Thorat, K McDaniel, JA Salomon

| GHCEA<br>Registry<br>Article ID | PubMed ID | Title                                                                                                                                             | Year | Categorization |
|---------------------------------|-----------|---------------------------------------------------------------------------------------------------------------------------------------------------|------|----------------|
| 2002-01-0515                    | 12076553  | Feasibility and cost-effectiveness of standardised second-line drug treatment for chronic tuberculosis patients: a national cohort study in Peru. | 2002 | Informal       |
| 2003-01-0408                    | 14997239  | Human health benefits from livestock vaccination for brucellosis: case study.                                                                     | 2003 | Informal       |
| 2005-01-00265                   | 16282407  | Cost effectiveness analysis of strategies for maternal and neonatal health in developing countries.                                               | 2005 | Informal       |
| 2005-01-00333                   | 15689430  | The cost-effectiveness of introducing hepatitis B vaccine into infant immunization services in Mozambique.                                        | 2005 | Informal       |
| 2006-01-00200                   | 16968123  | Feasibility and cost-effectiveness of treating multidrug-resistant tuberculosis: a cohort study in the Philippines.                               | 2006 | Informal       |
| 2006-01-00214                   | 16785697  | Cost-effectiveness analysis of antiretroviral drug treatment and HIV-1 vaccination in Thailand.                                                   | 2006 | Informal       |
| 2006-01-00222                   | 16682433  | The cost-effectiveness of improving malaria home management: shopkeeper training in rural Kenya.                                                  | 2006 | Informal       |

|               |          |                                                                                                                                           |      |          |
|---------------|----------|-------------------------------------------------------------------------------------------------------------------------------------------|------|----------|
| 2006-01-00251 | 16317205 | Cost-effectiveness of free HIV voluntary counseling and testing through a community-based AIDS service organization in Northern Tanzania. | 2006 | Informal |
| 2007-01-00072 | 18038073 | Economic evaluation of hepatitis B vaccination in low-income countries: using cost-effectiveness affordability curves.                    | 2007 | Informal |
| 2007-01-00105 | 17875014 | Cost-effectiveness of annual targeted larviciding campaigns in Cambodia against the dengue vector <i>Aedes aegypti</i> .                  | 2007 | Informal |
| 2007-01-00135 | 17535105 | Cost-effectiveness of rapid syphilis screening in prenatal HIV testing programs in Haiti.                                                 | 2007 | Informal |
| 2007-01-00167 | 17308266 | What is the most cost-effective population-based cancer screening program for Chinese women?                                              | 2007 | Informal |
| 2008-01-00031 | 18398383 | Vaccine-preventable haemophilus influenza type B disease burden and cost-effectiveness of infant vaccination in Indonesia.                | 2008 | Informal |
| 2008-01-01783 | 18562457 | The cost of Child Health Days: a case study of Ethiopia's Enhanced Outreach Strategy (EOS).                                               | 2008 | Informal |
| 2009-01-01591 | 19931723 | Economic evaluation of a routine rotavirus vaccination programme in Indonesia.                                                            | 2009 | Informal |
| 2009-01-01612 | 19824189 | Cost-effectiveness of new-generation oral cholera vaccines: a multisite analysis.                                                         | 2009 | Informal |
| 2009-01-01613 | 19817621 | Cost-benefit analysis of a rotavirus immunization program in the Arab Republic of Egypt.                                                  | 2009 | Informal |
| 2009-01-01617 | 19817591 | Cost-effectiveness of rotavirus vaccination in Peru.                                                                                      | 2009 | Informal |
| 2009-01-01633 | 19706492 | Transmission dynamics and economics of rabies control in dogs and humans in an African city.                                              | 2009 | Informal |
| 2009-01-01712 | 19159483 | Cost-effectiveness of Rotavirus vaccination in Vietnam.                                                                                   | 2009 | Informal |
| 2010-01-01406 | 21179503 | The potential economic value of a <i>Trypanosoma cruzi</i> (Chagas disease) vaccine in Latin America.                                     | 2010 | Formal   |

|               |          |                                                                                                                                                |      |          |
|---------------|----------|------------------------------------------------------------------------------------------------------------------------------------------------|------|----------|
| 2010-01-01517 | 20470426 | Health and economic impact of rotavirus vaccination in GAVI-eligible countries.                                                                | 2010 | Formal   |
| 2011-01-01260 | 21945959 | The cost-effectiveness of rotavirus vaccination in Armenia.                                                                                    | 2011 | Formal   |
| 2011-01-01287 | 21857810 | Serological testing versus other strategies for diagnosis of active tuberculosis in India: a cost-effectiveness analysis.                      | 2011 | Informal |
| 2011-01-01307 | 21734764 | Cost-effectiveness of parenteral artesunate for treating children with severe malaria in sub-Saharan Africa.                                   | 2011 | Formal   |
| 2011-01-01312 | 21720546 | Comparative economic evaluation of Haemophilus influenzae type b vaccination in Belarus and Uzbekistan.                                        | 2011 | Informal |
| 2012-01-01089 | 22719233 | A multifaceted intervention to improve the quality of care of children in district hospitals in Kenya: a cost-effectiveness analysis.          | 2012 | Formal   |
| 2012-01-01374 | 21378101 | Cost-effectiveness of community-based management of acute malnutrition in Malawi.                                                              | 2012 | Informal |
| 2013-01-00734 | 24349314 | Cost-effectiveness analysis of breast cancer control interventions in Peru.                                                                    | 2013 | Formal   |
| 2013-01-00744 | 24331749 | Model-based impact and cost-effectiveness of cervical cancer prevention in sub-Saharan Africa.                                                 | 2013 | Formal   |
| 2013-01-00773 | 24223524 | Antenatal Syphilis screening using point-of-care testing in Sub-Saharan African countries: a cost-effectiveness analysis.                      | 2013 | Formal   |
| 2013-01-01153 | 22407018 | Cost-effectiveness of Haemophilus influenzae type b (Hib) vaccine introduction in the universal immunization schedule in Haryana State, India. | 2013 | Informal |
| 2014-01-00629 | 24769920 | Cost-effectiveness of breast cancer control strategies in central america: the cases of costa rica and Mexico.                                 | 2014 | Formal   |
| 2014-01-00988 | 23242696 | Child Health Week in Zambia: costs, efficiency, coverage and a reassessment of need.                                                           | 2014 | Informal |
| 2014-01-02096 | 25476586 | Cost-effectiveness of larviciding for urban malaria control in Tanzania.                                                                       | 2014 | Informal |

|               |          |                                                                                                                                                                |      |          |
|---------------|----------|----------------------------------------------------------------------------------------------------------------------------------------------------------------|------|----------|
| 2014-01-02136 | 25304420 | Cost-effectiveness of HIV prevention for high-risk groups at scale: an economic evaluation of the Avahan programme in south India.                             | 2014 | Informal |
| 2014-01-02222 | 24969782 | Scaling up integrated prevention campaigns for global health: costs and cost-effectiveness in 70 countries.                                                    | 2014 | Informal |
| 2015-01-01801 | 26491060 | Scaling-up essential neuropsychiatric services in Ethiopia: a cost-effectiveness analysis.                                                                     | 2015 | Formal   |
| 2015-01-01824 | 26423002 | Scaling up of HIV treatment for men who have sex with men in Bangkok: a modelling and costing study.                                                           | 2015 | Informal |
| 2015-01-01827 | 26413788 | Improving Maternal Care through a State-Wide Health Insurance Program: A Cost and Cost-Effectiveness Study in Rural Nigeria.                                   | 2015 | Formal   |
| 2015-01-01957 | 25919162 | Cost-effectiveness of rotavirus vaccination in Albania.                                                                                                        | 2015 | Informal |
| 2015-01-01960 | 25919158 | Cost-effectiveness of HPV vaccination in Belize.                                                                                                               | 2015 | Informal |
| 2015-01-01961 | 25919157 | Cost-effectiveness analysis of the introduction of the human papillomavirus vaccine in Honduras.                                                               | 2015 | Formal   |
| 2015-01-01962 | 25919156 | Cost-effectiveness analysis of 10- and 13-valent pneumococcal conjugate vaccines in Peru.                                                                      | 2015 | Informal |
| 2015-01-01963 | 25919154 | Cost-effectiveness analysis of introducing universal human papillomavirus vaccination of girls aged 11 years into the National Immunization Program in Brazil. | 2015 | Informal |
| 2015-01-02007 | 25768008 | A cost-effectiveness analysis of a program to control rheumatic fever and rheumatic heart disease in Pinar del Rio, Cuba.                                      | 2015 | Informal |
| 2015-01-02030 | 25691915 | Comparison of impact and cost-effectiveness of rotavirus supplementary and routine immunization in a complex humanitarian emergency, Somali case study.        | 2015 | Informal |

|               |          |                                                                                                                                   |      |          |
|---------------|----------|-----------------------------------------------------------------------------------------------------------------------------------|------|----------|
| 2015-01-02335 | 26555122 | Health and Economic Implications of National Treatment Coverage for Cardiovascular Disease in India: Cost-Effectiveness Analysis. | 2015 | Informal |
| 2016-01-02270 | 26765291 | Health and economic benefits of public financing of epilepsy treatment in India: An agent-based simulation model.                 | 2016 | Informal |

---

---
