# Supplementary material for: When cost-effective interventions are unaffordable: Integrating cost-effectiveness and budget impact in priority setting for global health programs
Source: PubMed Central journal article supplement (PMC5624570; doi:10.1371/journal.pmed.1002397), 2017-10-02
Supplement: pmed.1002397.s002.pdf [file pmed.1002397.s002.pdf]

# S1 Text: Selection process and summary of articles analyzed

A Bilinski, P Neumann, J Cohen, T Thorat, K McDaniel, JA Salomon

## Selection process

We first used a full-text search on the Global Health Cost-Effectiveness Analysis (GHCEA) Registry (n=484) to identify articles from low-and-middle income countries (LMIC) (n=384). We then found articles either contained the phrase “budget impact” in a full-text search (n=19) and/or were marked in the GHCEA Registry as presenting aggregate cost for a full target population (n=34). From this subset, we identified studies that conducted a formal BIA (n=12), which mentioned BIA in their methods and results sections or informal BIA (n=37), mentioning budget impact in the discussion section or indirectly in other results.

## Summary of articles with formal or informal BIA

| Category                  | Item                                           | Formal BIA articles<br>(N = 12) | All LMIC articles<br>(N = 384) |
|---------------------------|------------------------------------------------|---------------------------------|--------------------------------|
| Intervention <sup>1</sup> | Immunization (%)                               | 25 (51)                         | 118 (31)                       |
|                           | Pharmaceutical or device (%)                   | 14 (29)                         | 126 (33)                       |
|                           | Other (%)                                      | 10 (20)                         | 140 (36)                       |
| Region <sup>2</sup>       | Asia (%)                                       | 17 (35)                         | 110 (29)                       |
|                           | Sub-Saharan Africa (%)                         | 15 (31)                         | 144 (38)                       |
|                           | Latin America (%)                              | 7 (14)                          | 40 (10)                        |
|                           | Other (%)                                      | 9 (18)                          | 89 (23)                        |
| Sponsorship <sup>3</sup>  | Government or academic (%)                     | 26 (53)                         | 187 (49)                       |
|                           | Foundation (%)                                 | 21 (43)                         | 135 (35)                       |
|                           | Pharmaceutical or device company (%)           | 3 (6)                           | 17 (4)                         |
| Analysis                  | National or regional scope (%)                 | 33 (67)                         | 262 (68)                       |
|                           | GDP cutoffs used (%) <sup>4</sup>              | 40 (82)                         | 259 (67)                       |
|                           | Health care payer perspective (%) <sup>5</sup> | 25 (51)                         | 235 (61)                       |
|                           | Published after 2010 (%)                       | 27 (55)                         | 230 (60)                       |
|                           | GHCEA Registry Rating - mean (sd)              | 5.2 (1.1)                       | 4.9 (1.1)                      |

<sup>1</sup>Interventions are presented as mutually exclusive. <sup>2</sup>Categories are not mutually exclusive, as articles can present more than one ICER. <sup>3</sup>Articles could have multiple sponsors or no sponsors.

<sup>4</sup>An intervention was deemed cost-effective if its ICER fell below a multiple of per capita GDP.

<sup>5</sup>CEA was conducted from a healthcare payer perspective, according to the GHCEA Registry reader.
